# Supplementary material for: Long-term Benefit of PD-L1 Blockade in Lung Cancer Associated with JAK3 Activation
Source: Oxford University Press journal article supplement (doi:10.1158/2326-6066.cir-15-0024), 2015-05-27
Supplement: 23266066cir150024-sup-144246_1_supp_2930715_nmhncn.docx [file 23266066cir150024-sup-144246_1_supp_2930715_nmhncn.docx]

**Supplementary Appendix**

**SUPPLEMENTARY FIGURES AND LEGENDS**

**Figure S1: Orthogonal sequencing of JAK3 mutations.** Polymerase chain reaction (PCR) tracings for V722I (A) and S61C (B) alterations observed in the tumor and germline DNA from the patient.

**Figure S2: Copy number profile of tumor.** Copy number profile of the patient’s tumor is shown across the exome. The profile is organized by chromosome. CR: copy ratio.

**
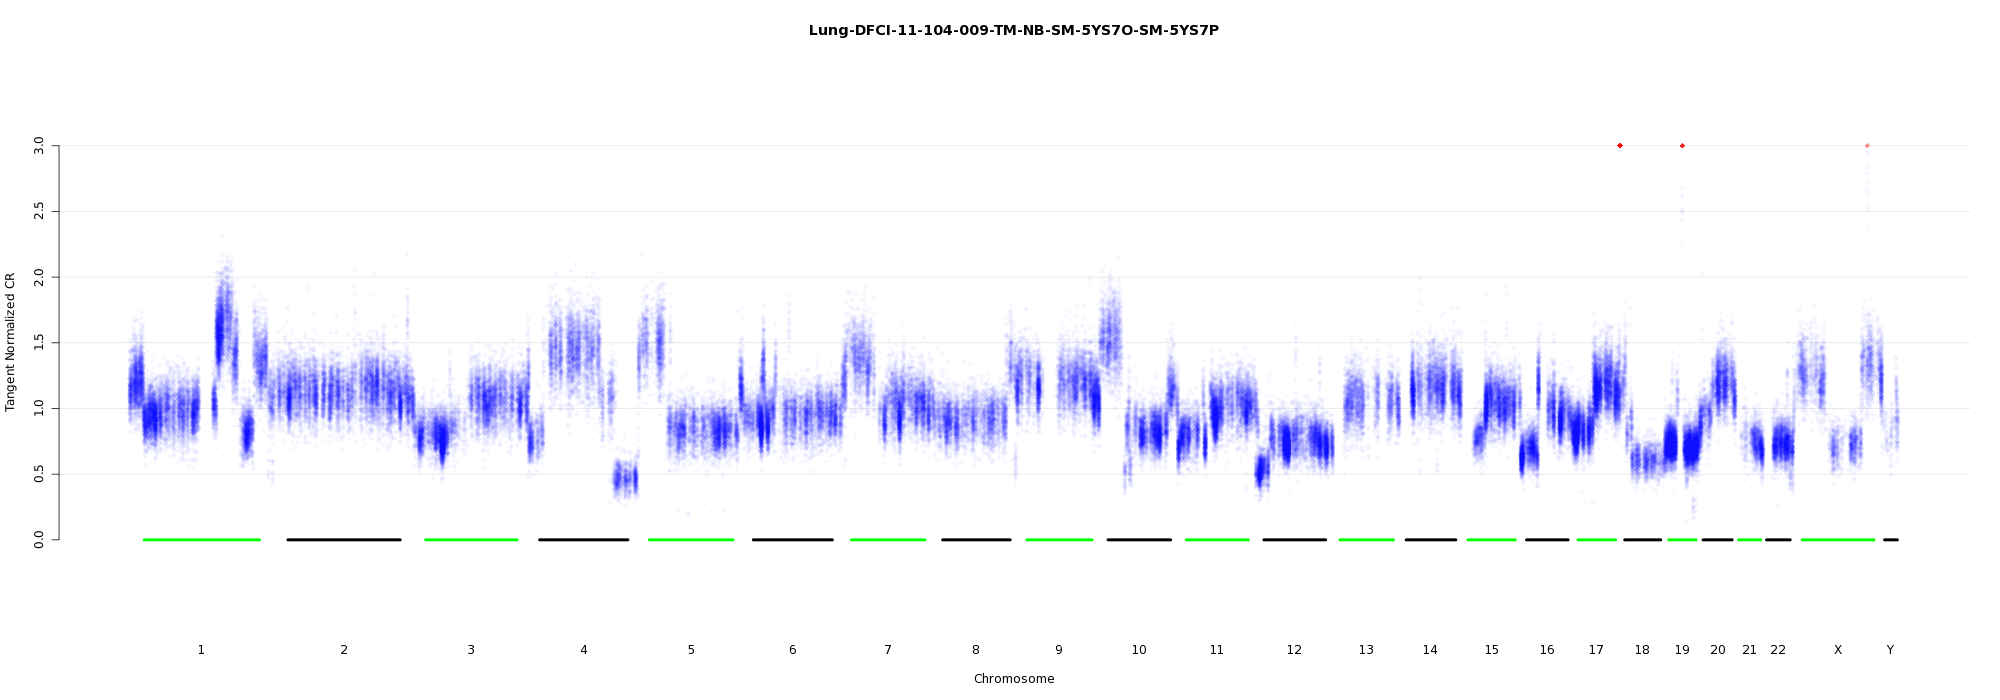
**

**Figure S3: Absolute copy number.** After correction for tumor purity, ploidy, and allele specific copy number, the absolute copy number derived from ABSOLUTE ([8](#_ENREF_8)) is shown by chromosome.


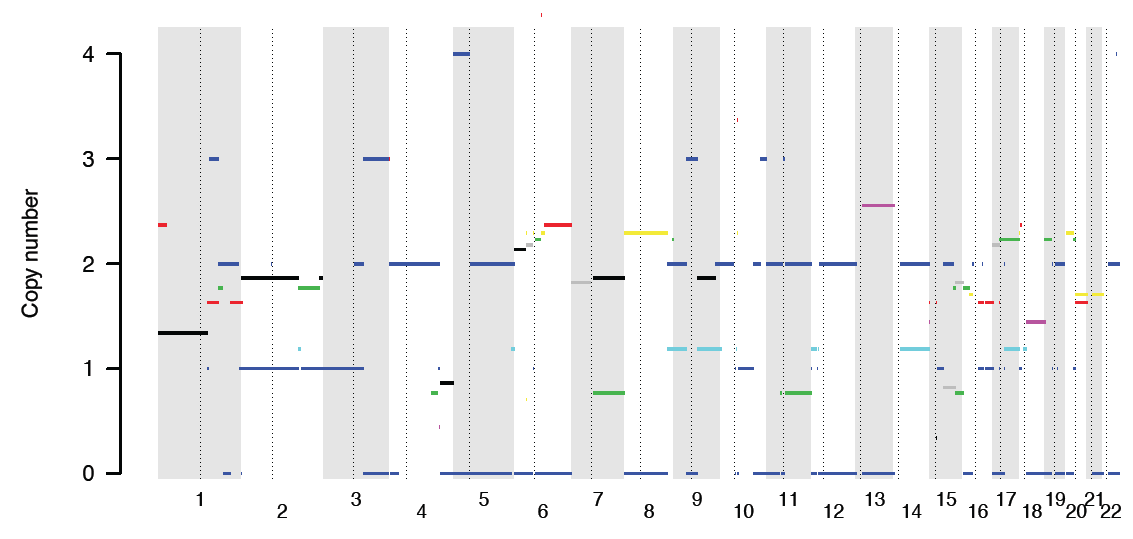


**Figure S4:** **PHIAL gel of patient’s somatic exome results.** Heuristic analysis of the somatic mutations, short insertion/deletions, and copy number alterations across the exome identify 18 mutations for additional evaluation.


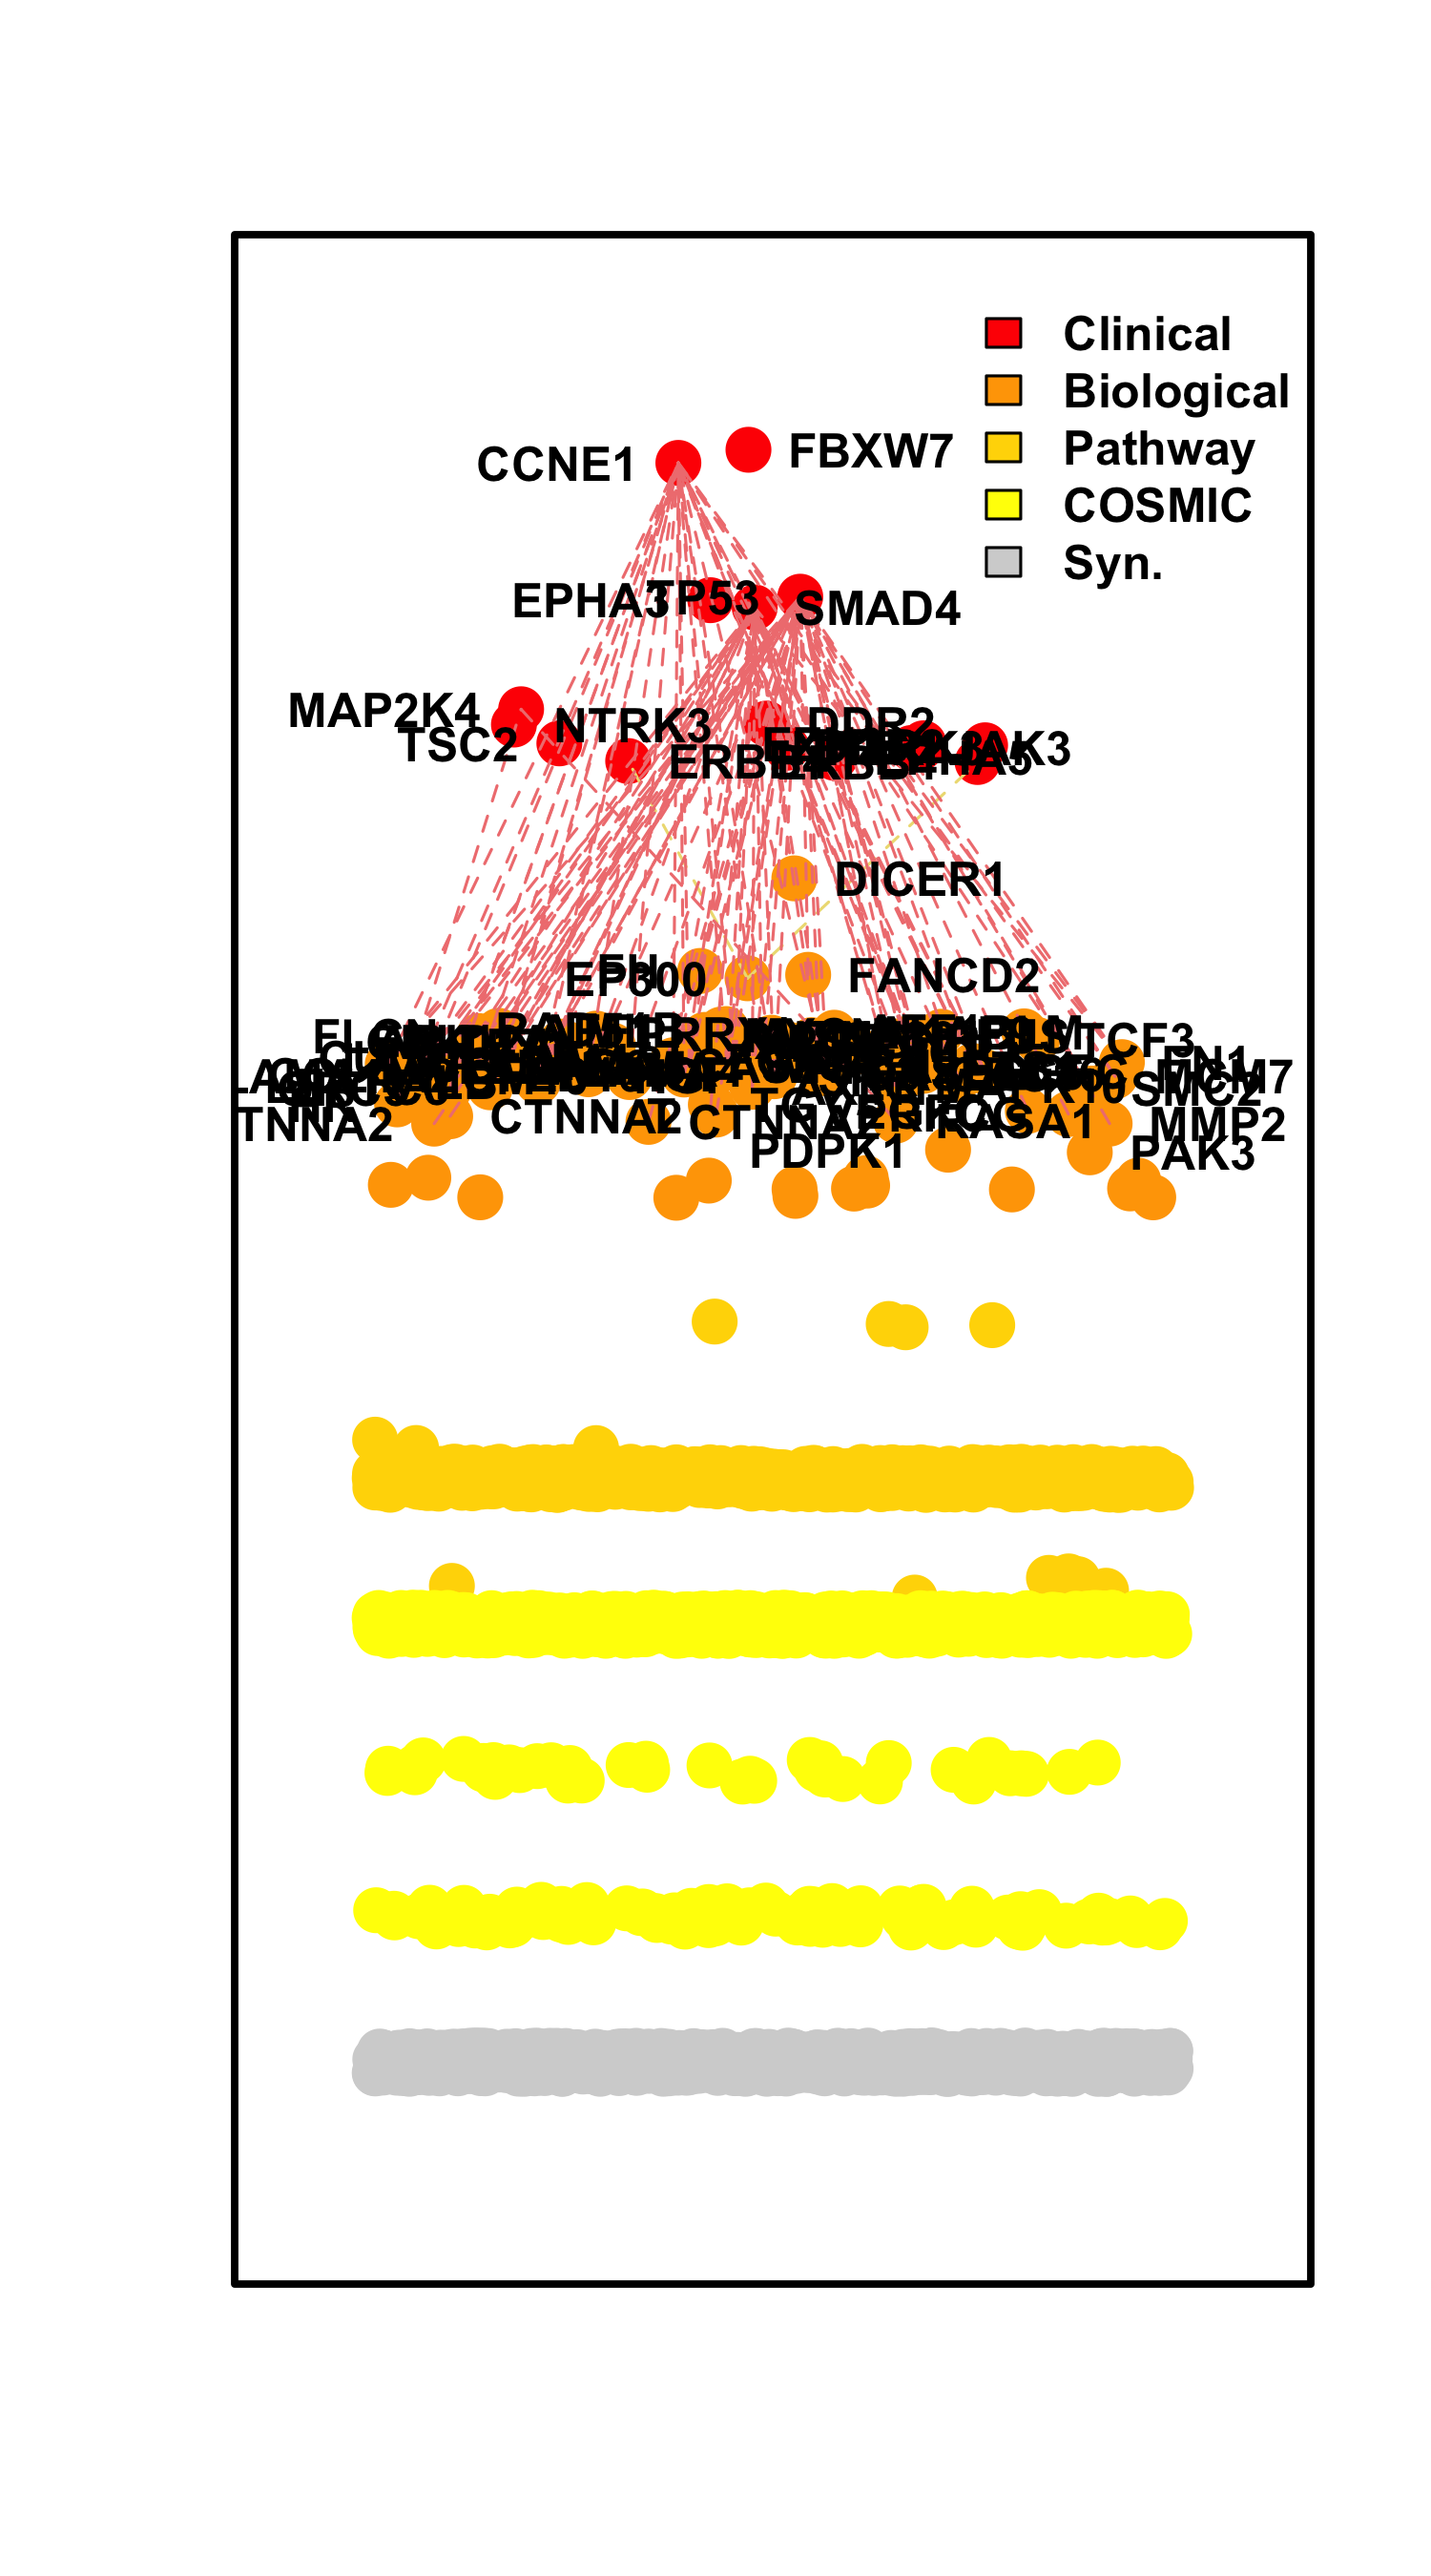


**Figure S5. Modified H-scores for tumor and immune cells.** Comparison of modified H-scores (% positive cells x staining intensity) between V722I-mutant cases and controls for tumor cells (A) and immune cells (B). P-values calculated using Mann-Whitney test.

**Figure S6. T cell re-activation following co-culture with JAK3-V722I expressing monocytes in the presence of MPDL3280A.** FACS plots of activated autologous CD4 and CD8 T cells (upper panels) or allogeneic CD4 and CD8 T cells (lower panels) following incubation with monocytes primed +/- IFN in the absence or presence of MPDL3820A. Highlighted is Gate 4, which was used to quantify % active T cells.

**SUPPLEMENTARY TABLES**

**Table S1: All somatic mutations and short insertion/deletions.** This table provides information on all somatic point mutations and short insertion/deletions observed in the tumor sample from this patient. Additional annotations about protein change, allelic fraction, copy ratio (as segment mean), and other information are provided.
